# Supplementary material
Source: PubMed Central journal article supplement (PMC2852878)
Supplement: NIHMS187428-supplement-Supplemental_data.pdf [file NIHMS187428-supplement-Supplemental_data.pdf]

## Supplementary Materials for

### **Follistatin Gene Delivery Enhances Muscle Growth and Strength in Nonhuman Primates**

Janaiah Kota, Chalonda R. Handy, Amanda M. Haidet, Chrystal L. Montgomery, Amy Eagle, Louise R. Rodino-Klapac, Danielle Tucker, Christopher J. Shilling, Walter R. Therlfall, Christopher M. Walker, Steven E. Weisbrode, Paul M. L. Janssen, K. Reed Clark, Zarife Sahenk, Jerry R. Mendell,\* Brian K. Kaspar\*

\*To whom correspondence should be addressed. E-mail: Brian.Kaspar@NationwideChildrens.org (B.K.K.); Jerry.Mendell@NationwideChildrens.org (J.R.M.)

Published 11 November 2009, *Sci. Transl. Med.* **1**, 6ra15 (2009)  
DOI: 10.1126/scitranslmed.3000112

#### **This PDF file includes:**

Fig. S1. MCK-FS causes myofiber hypertrophy and predominantly affects fast-twitch type 2 myofibers in the quadriceps muscle.

Fig. S2. Morphological effects on sperm from male cynomolgus macaques treated with AAV1-FS344.

Table S1. Menstrual cycles in untreated control and AAV1-FS344-treated cynomolgus macaques.

Table S2. Sperm motility and morphology of untreated control and AAV1-FS344-treated cynomolgus macaques.

Table S3. Primer and probe sets used in quantitative polymerase chain reaction (QPCR) for vector genome quantification.

## Supplementary Material

**Fig. S1**

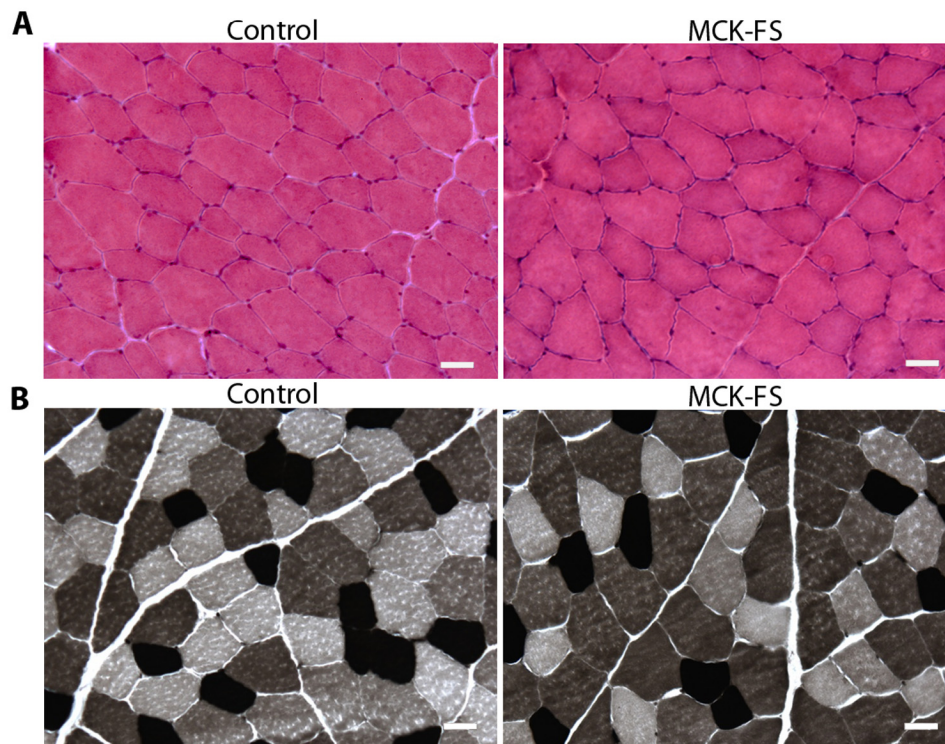

**Fig. S1 MCK-FS causes myofiber hypertrophy and predominantly affects fast-twitch type 2 myofibers in the quadriceps muscle.**

**(A)** H&E staining of the quadriceps muscle reveals myofiber hypertrophy in MCK-FS macaque (right) compared to untreated control (left). **(B)** Fiber types determined by ATPase staining (pH 4.6) in the MCK-FS macaque (right) compared to untreated control (left). Scale bars, 20 $\mu$ m.

**Table S1**

| <b>Months Post Injection</b>                     | <b>Control</b>    | <b>MCK-FS</b>     | <b>CMV-FS</b>     |
|--------------------------------------------------|-------------------|-------------------|-------------------|
| <b>10 months</b>                                 | + (27)            | + (26)            | + (26)            |
| <b>11 months</b>                                 | + (24)            | + (31)            | + (28)            |
| <b>12 months</b>                                 | + (28)            | + (24)            | ND                |
| <b>13 months</b>                                 | ND                | + (29)            | +                 |
| <b>14 months</b>                                 | +                 | + (31)            | + (30)            |
| <b>15 months</b>                                 | + (29)            | +                 | + (26)            |
| <b>Mean ± SD menstrual cycle duration (days)</b> | <b>27.0 ± 2.2</b> | <b>28.2 ± 3.1</b> | <b>27.5 ± 1.9</b> |

Abbreviations: ND, Not detected; SD, Standard Deviation

“+” indicates menstrual cycle detected. A value in parenthesis indicates days between two consecutive menstrual cycles.

**Table S1 Menstrual cycles in untreated control and AAV1-FS344 treated cynomolgus macaques.**

Menstrual cycles were monitored in female macaques following gene transfer. Both CMV-FS and MCK-FS treated macaques showed normal menstrual cycle duration compared to untreated control macaque. Data from 6 months prior to necropsy are shown.

**Table S2**

| <b>Group</b>          | <b>Motility (%)</b> | <b>Normal Morphology (%)</b> | <b>Abnormalities (%)</b> |
|-----------------------|---------------------|------------------------------|--------------------------|
| <b>Control #1</b>     | 60                  | 91                           | 9                        |
| <b>Control #2</b>     | 90                  | 77                           | 23                       |
| <b>Mean (Control)</b> | <b>75</b>           | <b>84</b>                    | <b>16</b>                |
|                       |                     |                              |                          |
| <b>CMV-FS</b>         | 65                  | 76                           | 24                       |

**Table S2 Sperm motility and morphology of untreated control and AAV1-FS344 treated cynomolgus macaques.**

Prior to necropsy, sperm was collected from untreated control and AAV1-FS344 treated macaques. There was no significant change in sperm motility and morphology in the CMV-FS macaque compared to untreated control macaques.

**Fig. S2**

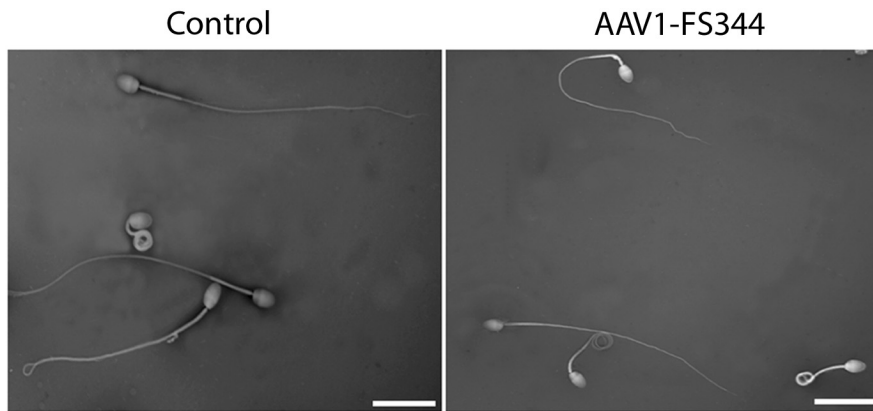

**Fig. S2 Morphological effects on sperm from male cynomolgus macaques treated with AAV1-FS344.**

Prior to necropsy, sperm was collected from untreated control and AAV1-FS344 treated macaques. The morphology of CMV-FS treated macaque sperm is similar to untreated controls.

**Table S3**

| <b>Amplicon</b>     | <b>Forward primer sequence</b> | <b>Reverse primer sequence</b> | <b>Taqman probe sequence</b>   |
|---------------------|--------------------------------|--------------------------------|--------------------------------|
| <b>CMV amplicon</b> | 5'TGGAAATCCCCGTG<br>AGTCAA3'   | 5'CATGGTGATGCGG<br>TTTTGG3'    | 5'CCGCTATCCACGC<br>CCATTGATG3' |
| <b>MCK amplicon</b> | 5'CCCGAGATGCCTGG<br>TTATAATT3' | 5'GCTCAGGCAGCAG<br>GTGTTG3'    | 5'CCAGACATGTGGC<br>TGCTCCCCC3' |

**Table S3 Primer and probe sets used in quantitative polymerase chain reaction (QPCR) for vector genome quantification.**
